# Supplementary material for: Identification of miRNA Signatures during the Differentiation of hESCs into Retinal Pigment Epithelial Cells
Source: PLoS One. 2012 Jul 27;7(7):e37224. doi: 10.1371/journal.pone.0037224 (PMC3407211; doi:10.1371/journal.pone.0037224)
Supplement: Table S1 — Gene expression data sets of various somatic tissues from GEO. (XLSX) [file pone.0037224.s002.xlsx]

## Sheet: Sheet1
Tissue name	Tissue	sample name (from dataset)	GEO/SRA record
heartL1	heart left atrium	miRNA_LA_1	GSE31999
heartL2	heart left atrium	miRNA_LA_2	GSE31999
heartR1	heart right atrium	miRNA_RA_1	GSE31999
heartR2	heart right atrium	miRNA_RA_2	GSE31999
breast1	breast	Breast_Normal_103B	GSE28884
breast2	breast	Breast_Normal_104C	GSE28884
breast3	breast	Breast_Normal_105B	GSE28884
skin1	normal skin	Skin Normal 1	GSE31037
skin2	normal skin	Skin Normal 2	GSE31037
skin3	normal skin	Skin Normal 3	GSE31037
melano1	melanoblast	QF1160MB	GSE18381
melano2	melanocyte	MELB	GSE18381
HMEC1	Human Mammary Epithelial Cells	184_EP	SRP001530
HMEC2	Human Mammary Epithelial Cells	240_EP	SRP001530
HMEC3	Human Mammary Epithelial Cells	48_EP	SRP001530
HMF1	Human Mammary Fibroblasts	184_FB	SRP001530
HMF2	Human Mammary Fibroblasts	240_FB	SRP001530
HMF3	Human Mammary Fibroblasts	48_FB	SRP001530
